# Supplementary material for: Frequency of joint inflammation is associated with local joint damage progression in rheumatoid arthritis despite long-term targeted treatment
Source: HighWire-hosted journal article supplement (doi:10.1136/rmdopen-2022-002552), 2023-01-01
Supplement: rmdopen-2022-002552supp002_data_supplement.pdf [file rmdopen-2022-002552supp002_data_supplement.pdf]

**Supplementary table 1: Baseline characteristics of included patients**

|                                                               | <b>N=473</b>     |
|---------------------------------------------------------------|------------------|
| <b>Age (years), mean (SD)</b>                                 | 54.3 (13.6)      |
| <b>Sex (female), n(%)</b>                                     | 317 (67%)        |
| <b>Body Mass Index (kg/m<sup>3</sup>), mean (SD)</b>          | 25.9 (4.1)       |
| <b>Ever smoker, n(%)</b>                                      | 166 (35%)        |
| <b>Symptom duration (weeks), median (IQR)</b>                 | 23.7 (13.9-52.7) |
| <b>DAS, mean (SD)</b>                                         | 4.4 (0.9)        |
| <b>ESR (mm/h), mean (SD)</b>                                  | 40.8 (27.7)      |
| <b>CRP (mg/l), mean (SD)</b>                                  | 37.8 (43.3)      |
| <b>Patient global assessment (0-100mm VAS), mean (SD)</b>     | 51.9 (20.0)      |
| <b>Swollen joint count, median (IQR)</b>                      | 13.0 (10.0-19.0) |
| <b>Tender joint count, median (IQR)</b>                       | 13.0 (9.0-18.0)  |
| <b>Anti-Citrullinated Peptide Antibodies (positive), n(%)</b> | 276 (62%)        |
| <b>Rheumatoid Factor (positive), n(%)</b>                     | 308 (65%)        |
| <b>HAQ score (0-3), median(IQR)</b>                           | 1.4 (1.0-1.9)    |
